# Supplementary material for: Unraveling the Genetic Etiology of Adult Antisocial Behavior: A Genome-Wide Association Study
Source: PubMed Central journal article supplement (PMC3471931; doi:10.1371/journal.pone.0045086), 2012-10-15
Supplement: pone.0045086.s001.pdf [file pone.0045086.s001.pdf]

# DYRK1A – combined design

Plotted SNPs

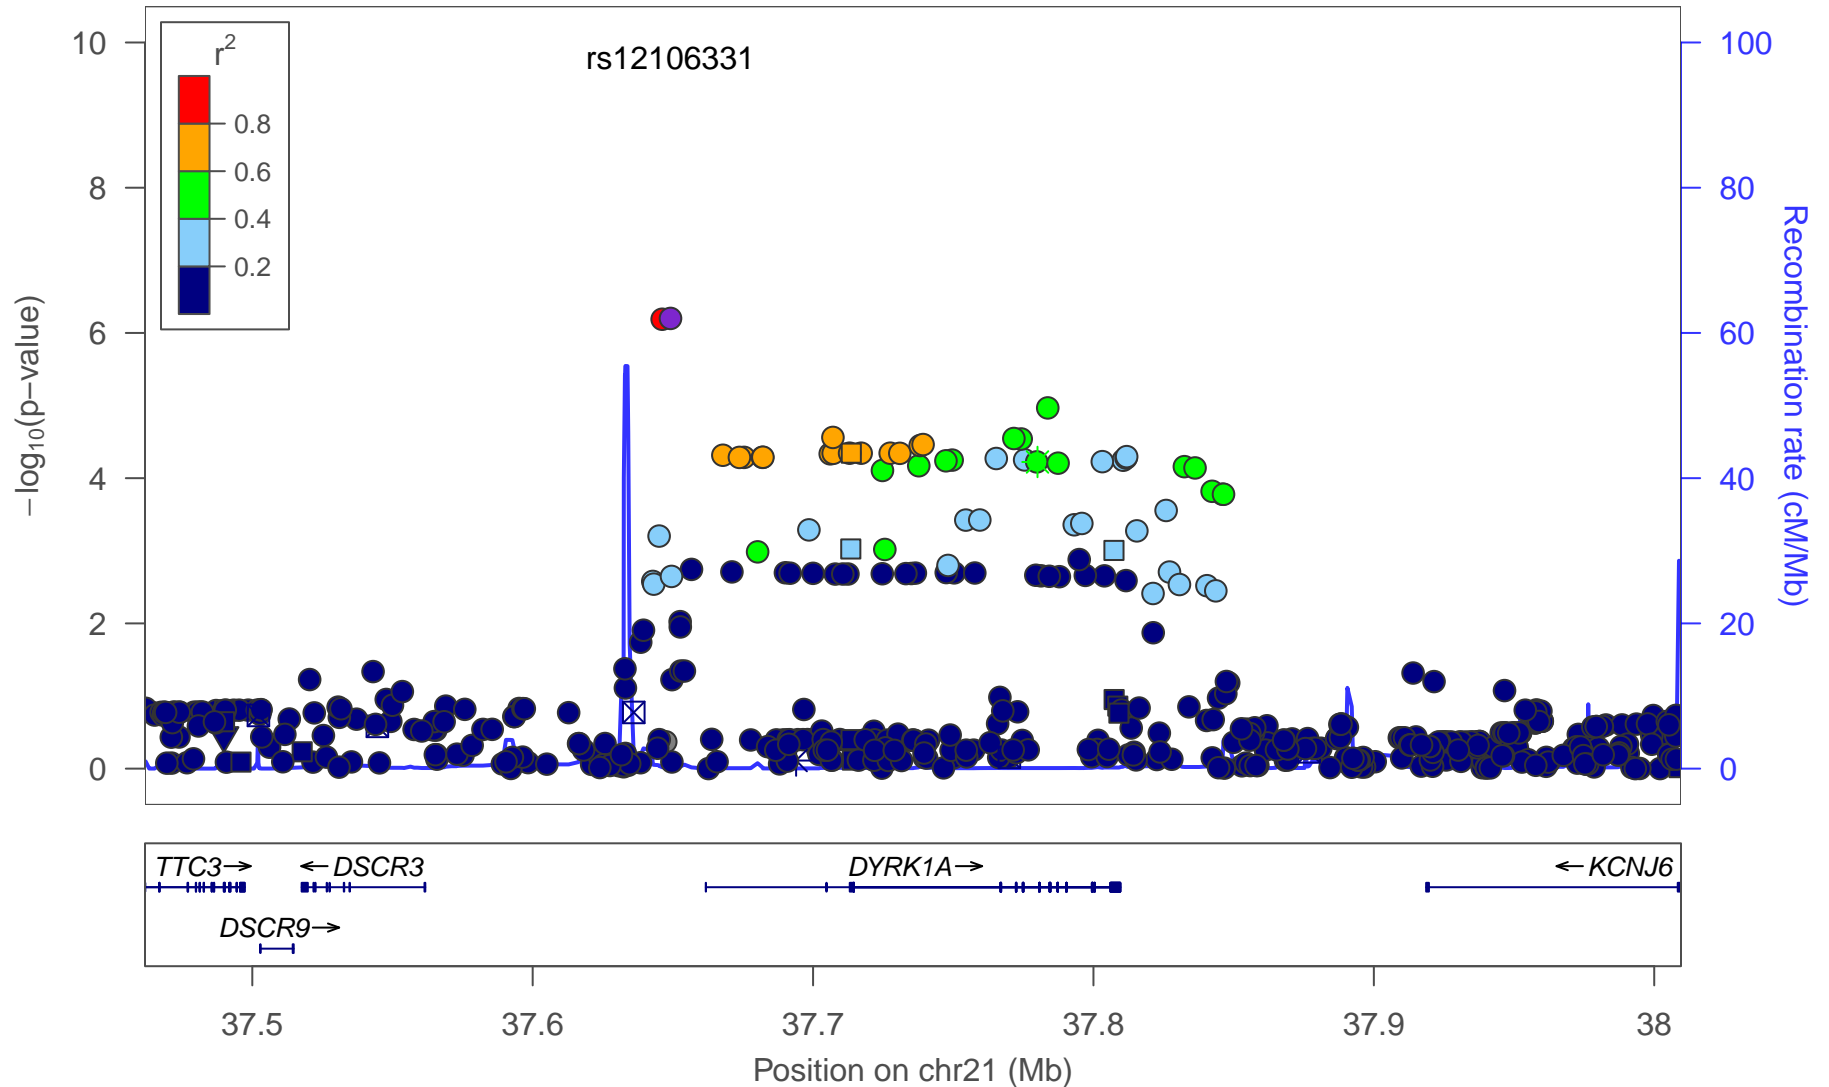

date: Wed Jul 6 04:47:50 2011

build: hg18

display range: chr21:37461728–38009549 [37461728–38009549]

hilite range: 0 – 0 [ 0 – 0 ]

reference SNP: rs12106331

number of SNPs plotted: 525

best p-value: 6.3E-7 [rs12106331]

annotation key

|                |   |
|----------------|---|
| framestop      | ▲ |
| splice         | ▲ |
| nonsyn         | ▼ |
| coding         | □ |
| utr            | □ |
| tfbscons       | * |
| mcs44placental | ⊠ |
| no annotation  | ○ |
